# Supplementary material for: Modern non-polarizable force fields diverge in modeling the enzyme–substrate complex of a canonical serine protease
Source: Royal Society of Chemistry journal article supplement (doi:10.1039/d2cp05502c), 2023-01-01
Supplement: d2cp05502c1.pdf [file d2cp05502c1.pdf]

## Supplementary Materials

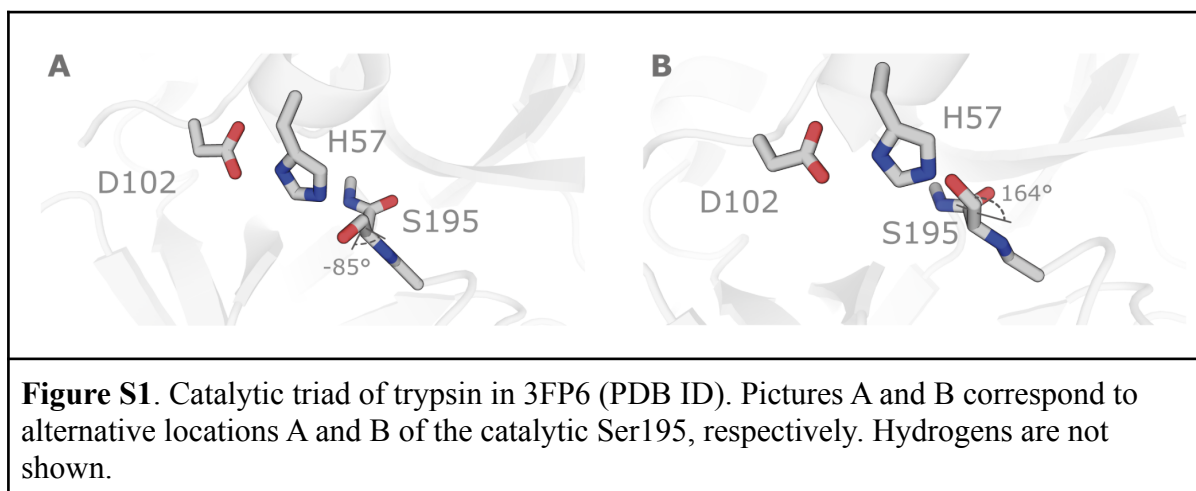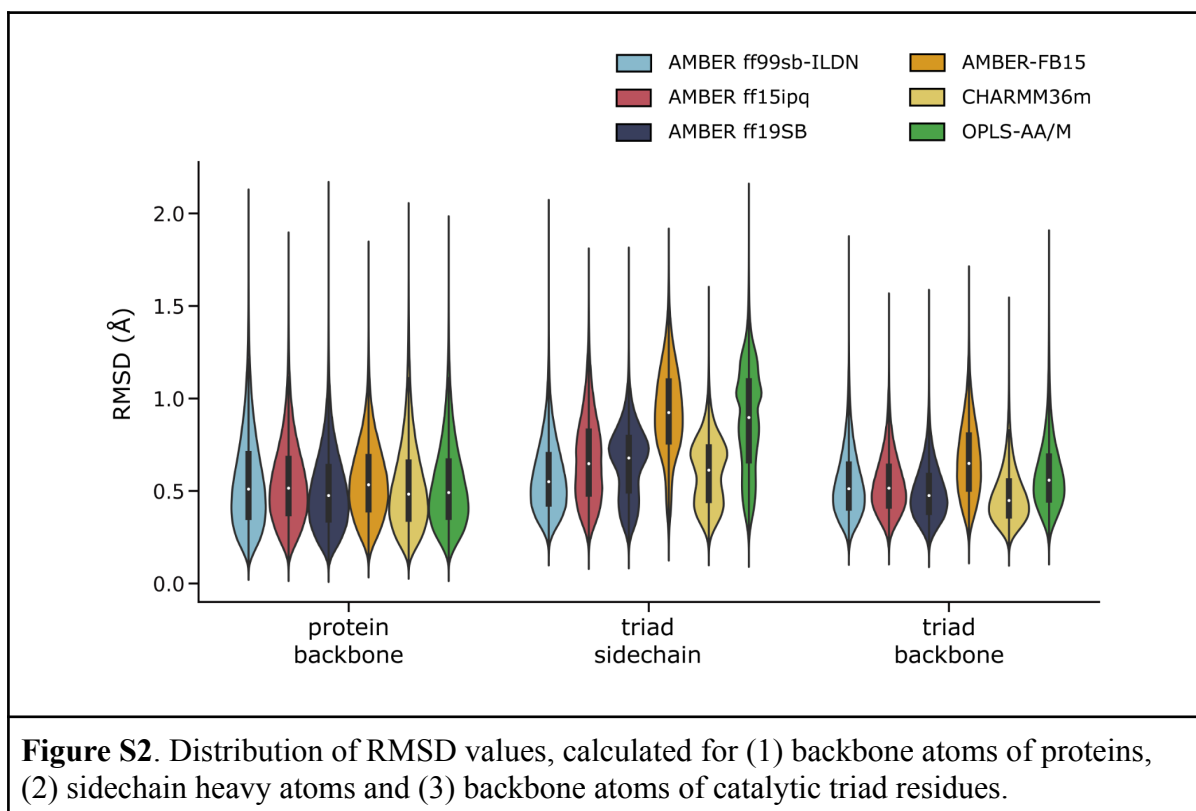

**Table S1.** Distances that had been selected as a descriptors for the clusterization process

1. His57 N – Asp102 O $\delta_1$
2. His57 O – His57 N $\delta$
3. His57 N $\delta$  – Asp102 O $\delta_2$
4. His57 N $\delta$  – Asp102 O $\delta_1$
5. His57 N $\epsilon$  – Ser195 O $\gamma$
6. Asp102 N – Leu99 O
7. Asp102 N – Asp102 O $\delta_1$
8. Asp102 O – Thr229 O $\gamma$
9. Asp102 O – Asp102 O $\delta_1$
10. Asp102 O $\delta_1$  – Ala56 N
11. Asp102 O $\delta_2$  – Ser214 O $\gamma$
12. Ser195 N – Lys15 (P1) O
13. Ser195 O $\gamma$  – Lys15 (P1) N
14. Ser195 O $\gamma$  – Lys15 (P1) O
15. Ser195 O $\gamma$  – Ala16 (P2) N
16. Ser195 O $\gamma$  – Ser195 O
17. Ser195 O – Gly43 N
18. Ser214 O – Lys15 (P1) N
19. Gly36 O – Ala16 (P2) N
20. Gly193 N – Lys15 (P1) O
21. Ser214 O $\gamma$  – Ser214 O

**Table S2.** Productive and non-productive clusters

|             |                     |
|-------------|---------------------|
| Cluster 1   | non-productive      |
| Cluster 2   | non-productive      |
| Cluster 3.1 | non-productive      |
| Cluster 3.2 | non-productive      |
| Cluster 4.1 | non-productive      |
| Cluster 4.2 | probably productive |
| Cluster 5   | productive          |
| Cluster 6   | productive          |

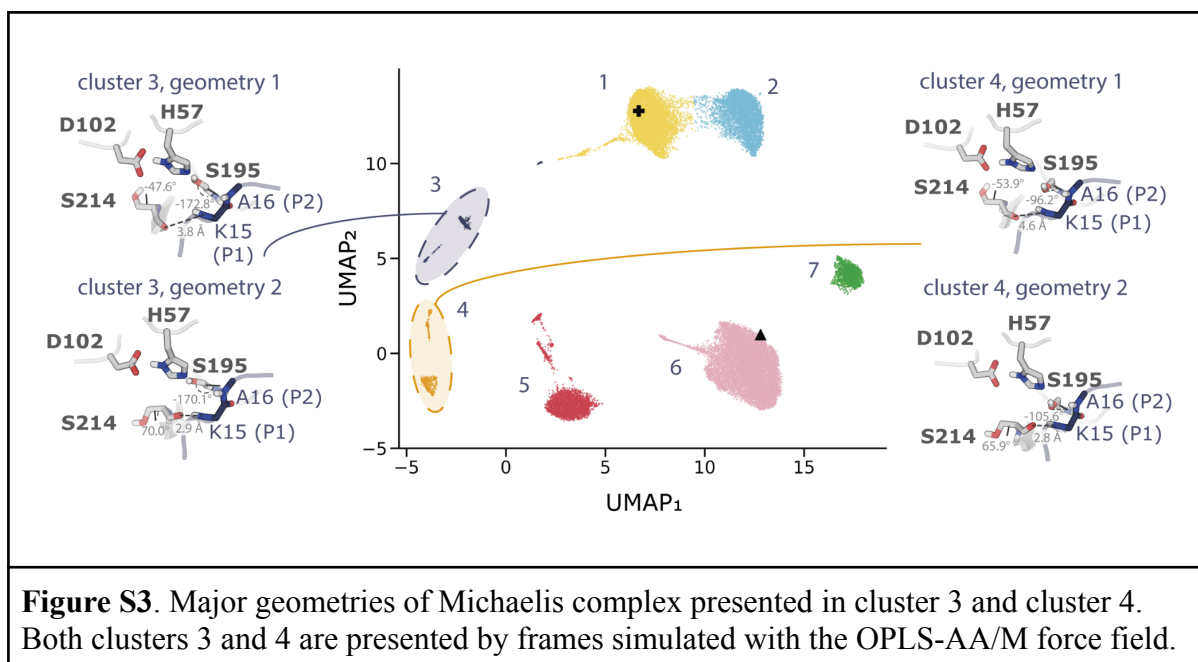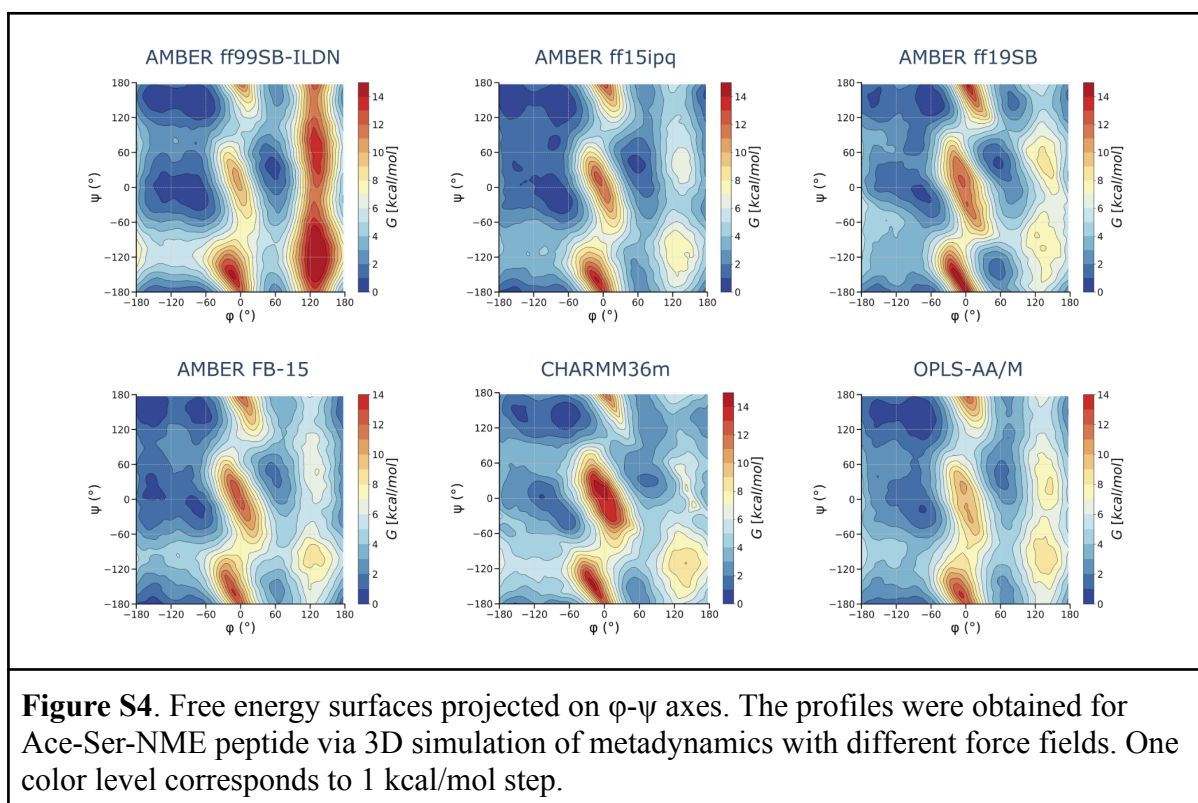

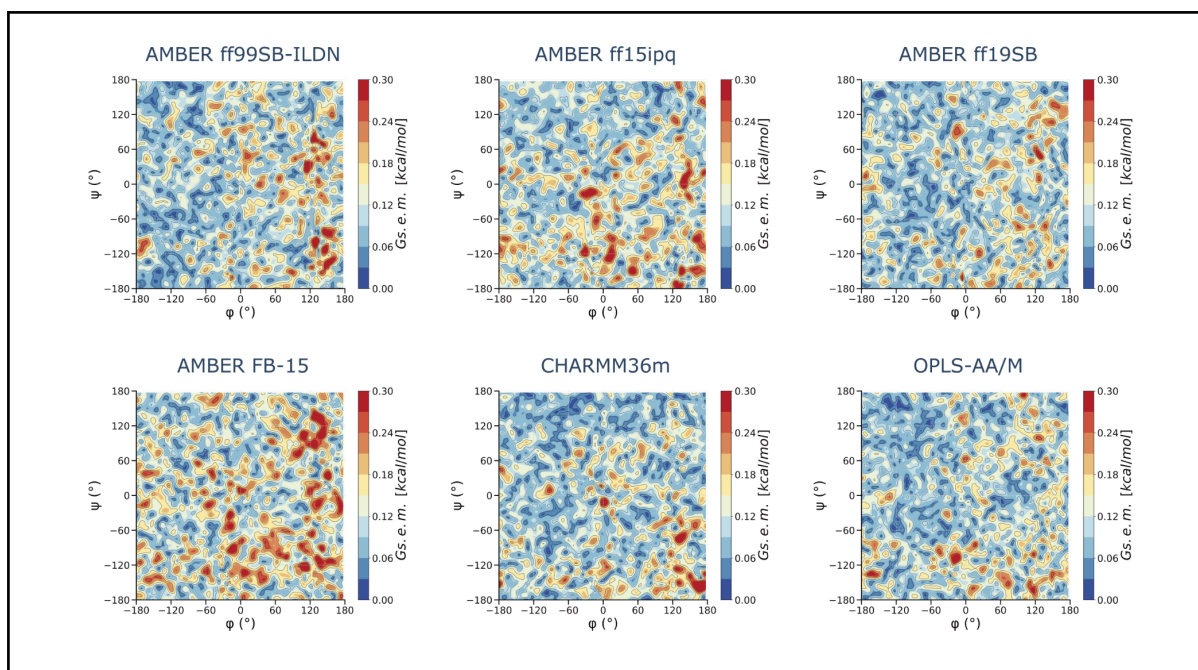

**Figure S5.** Reproducibility in metadynamics simulations. Reproducibility is shown as free energy profile standard errors of mean from 5 profiles obtained from 5 independent replicas.

**Table S3.** Atomic charges derived from six non-polarizable force fields

|     |              | Amber<br>ff99sb-ildn | Amber<br>ff15ipq | Amber<br>ff19sb | Amber<br>FB-15 | CHARMM<br>36m | OPLS-AA/M |
|-----|--------------|----------------------|------------------|-----------------|----------------|---------------|-----------|
| Ser | N            | -0.4157              | -0.51112         | -0.4157         | -0.4157        | -0.47         | -0.5      |
| Ser | O            | -0.5679              | -0.58991         | -0.5679         | -0.5679        | -0.51         | -0.5      |
| Ser | O $\gamma$   | -0.6546              | -0.56858         | -0.6546         | -0.6546        | -0.66         | -0.683    |
| Ser | H $\gamma$   | 0.4275               | 0.3849           | 0.4275          | 0.4275         | 0.43          | 0.418     |
| His | N $\delta$   | -0.3811              | -0.35736         | -0.3811         | -0.3811        | -0.36         | -0.57     |
| His | H $\delta$   | 0.3649               | 0.37921          | 0.3649          | 0.3649         | 0.32          | 0.418     |
| His | N $\epsilon$ | -0.5727              | -0.62533         | -0.5727         | -0.5727        | -0.7          | -0.49     |
| Lys | N            | -0.3479              | -0.3908          | -0.3479         | -0.3479        | -0.47         | -0.5      |
| Lys | H            | 0.2747               | 0.31584          | 0.2747          | 0.2747         | 0.31          | 0.3       |
| Lys | O            | -0.5894              | -0.63388         | -0.5894         | -0.5894        | -0.51         | -0.5      |
| Asp | O            | -0.5819              | -0.63086         | -0.5819         | -0.5819        | -0.51         | -0.5      |
| Asp | O $\delta_2$ | -0.8014              | -0.85227         | -0.8014         | -0.8014        | -0.76         | -0.8      |
| Thr | O $\gamma$   | -0.6761              | -0.57965         | -0.6761         | -0.6761        | -0.66         | -0.683    |
| Thr | H $\gamma$   | 0.4102               | 0.37731          | 0.4102          | 0.4102         | 0.43          | 0.418     |

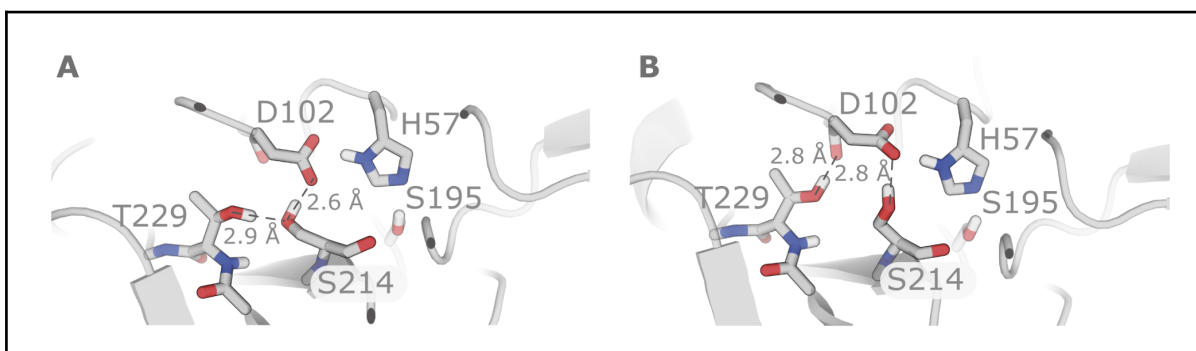

**Figure S6.** Competition for being acceptor of h-bond from Thr229 O $\gamma$  between Asp102 O and Ser214 O $\gamma$ . Here represented geometries corresponding to the (A) cluster 5, and (B) cluster 6.

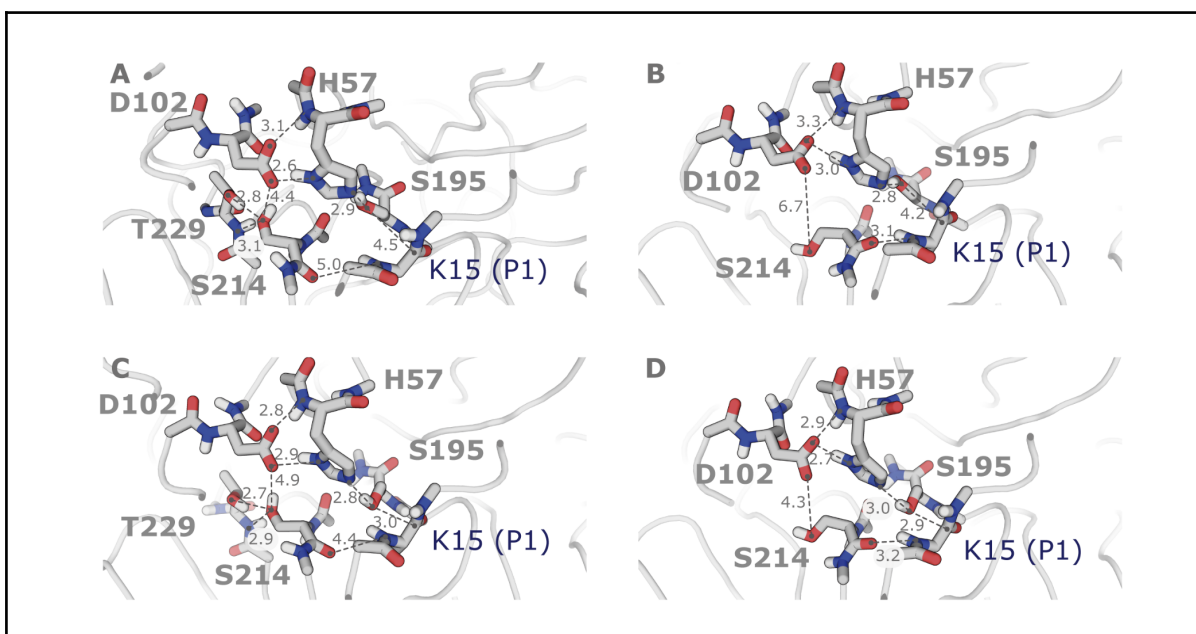

**Fig. S7.** Representative geometries of the active site produced by OPLS-AA/M. Subclusters 3.1 (A), 3.2 (B), 4.1 (C), 4.2 (D) are presented. Interatomic distances (Å) shown by dark-gray dashed lines. Enzyme labels are dark-gray (bold font), while substrate labels are dark-blue (regular font).

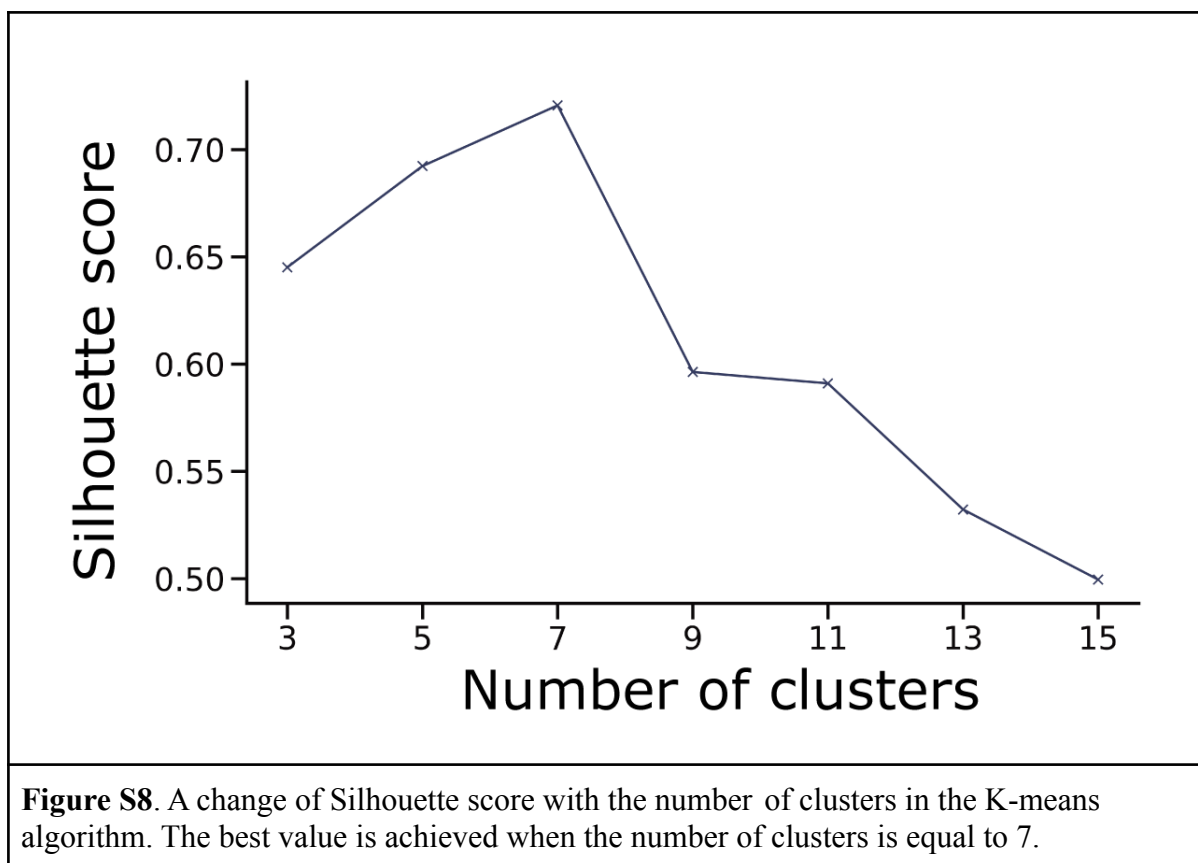

**Table S4.** Three-point water models used in simulations with every force field

| force field                                                 | $\sigma_{\text{O}_2}$ (Å) | $\epsilon_{\text{O}_2}$ (kJ/mol) | $r_{\text{OH}}$ (Å) | $r_{\text{HH}}$ (Å) |
|-------------------------------------------------------------|---------------------------|----------------------------------|---------------------|---------------------|
| Amber ff99sb-ildn,<br>Amber ff19sb,<br>OPLS-AA/M<br>(TIP3P) | 3.15061                   | 0.636386                         | 0.9572              | 1.5139              |
| Amber ff 15 ipq<br>(SPC/Eb)                                 | 3.16557                   | 0.650629                         | 1.01                | 1.64933             |
| Amber FB-15<br>(TIP3P-FB)                                   | 3.17796456355             | 0.652143528104                   | 1.01181082494       | 1.63868385147       |
| CHARMM36m<br>(TIP3P)                                        | 3.15057422683             | 0.6363864                        | 0.9572              | 1.5139              |
